# Supplementary material for: One-third of amenorrheic transmasculine people on testosterone ovulate
Source: PubMed Central journal article supplement (PMC10982961; doi:10.1016/j.xcrm.2024.101440), 2024-02-22
Supplement: mmc1.pdf [file mmc1.pdf]

**Cell Reports Medicine, Volume 5**

**Supplemental information**

**One-third of amenorrheic transmasculine people  
on testosterone ovulate**

**Joyce D. Asseler, Julieta S. del Valle, Susana M. Chuva de Sousa Lopes, Marieke O. Verhoeven, Mariette Goddijn, Judith A.F. Huirne, and Norah M. van Mello**

Table S1. Data on prior GnRHa users of study cohort, related to Table 1.

|    | Age at GAS, years | Age at start GnRHa, years | Total time on GnRHa, months | Indication GnRHa | Tanner stage at time start GnRHa | Time of GnRHa cessation prior to GAS, months | Histological signs of recent ovulatory activity |
|----|-------------------|---------------------------|-----------------------------|------------------|----------------------------------|----------------------------------------------|-------------------------------------------------|
| 1  | 20                | 14                        | 40                          | PS               | Unknown                          | 30                                           | Yes, corpus luteum and corpus albicans          |
| 2  | 19                | 14                        | 19                          | PS               | M4P5                             | 35                                           | Yes, corpus luteum and corpus albicans          |
| 3  | 20                | 16                        | 14                          | PS               | M5P5                             | 22                                           | Yes, corpus albicans                            |
| 4  | 21                | 17                        | 9                           | PS               | M5P5                             | 40                                           | Yes, corpus luteum                              |
| 5  | 20                | 17                        | 11                          | PS               | M5P5                             | 23                                           | Yes, corpus luteum                              |
| 6  | 18                | 13                        | 47                          | PS               | M3P3                             | 9                                            | No                                              |
| 7  | 18                | 16                        | 19                          | PS               | M5P5                             | 8                                            | No                                              |
| 8  | 21                | 17                        | 26                          | PS               | M5P5                             | 18                                           | No                                              |
| 9  | 19                | 17                        | 12                          | PS               | M5P5                             | 25                                           | No                                              |
| 10 | 28                | 26                        | 4                           | B                | N/a                              | 18                                           | No                                              |
| 11 | 19                | 11                        | 49                          | PS               | M4P5                             | 42                                           | No                                              |
| 12 | 21                | 17                        | 12                          | PS               | M5P5                             | 40                                           | No                                              |
| 13 | 19                | 16                        | 36                          | PS               | Unknown                          | 7                                            | No                                              |
| 14 | 19                | 12                        | 50                          | PS               | M3P2                             | 31                                           | No                                              |
| 15 | 18                | 12                        | 55                          | PS               | M3P4                             | 19                                           | No                                              |

Abbreviations used in table: GnRHa = gonadotropin-releasing hormone agonist, PS = puberty suppressant, N/a = not applicable, B: persistent blood loss.
